# Supplementary material for: Hypothalamic melanin-concentrating hormone neurons integrate food-motivated appetitive and consummatory processes in rats
Source: Springer Nature journal article supplement (doi:10.1038/s41467-023-37344-9), 2023-03-29
Supplement: MOESM1 [file 41467_2023_37344_MOESM1_ESM.pdf]

Hypothalamic melanin-concentrating hormone neurons integrate food-motivated  
appetitive and consummatory processes in male rats

Subramanian et al.

# Supplementary Figure 1

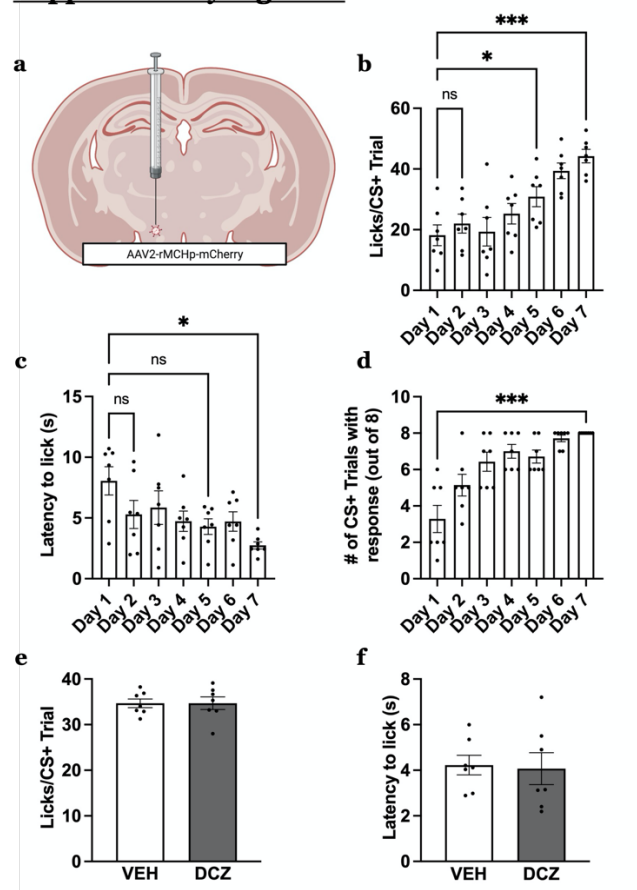

**Supplementary Figure 1. IP DCZ does not impact appetitive responsivity to discrete sucrose-predictive Pavlovian cues in rats (n=7).** Animals were injected using a counterbalanced, within subjects design. **a** Schematic cartoon depicting viral approach to administer a cre-dependent adeno-associated-virus containing excitatory MCH DREADDs-mCherry transgene (AAV2-DIO-rMCHp-hM3D(Gq)-mCherry) into the LHA and ZI. IP DCZ does not activate the DREADD unless Cre is also administered. **b-d** Training data for the Pavlovian Discrimination Task (data were analyzed using a one-way ANOVA with repeated measures and multiple comparisons, n=7 rats) with **b** Average number of licks for sucrose solution per CS+ trial, **c** Average latency to lick from sucrose solution per CS+ trial and **d** Average number of CS+ trials with response via licking sucrose solution. **e-f** Effects of IP DCZ during test phase of the Pavlovian Discrimination Task (data analyzed using Students two-tailed paired t-test, n=7 rats) with **e** Average number of licks for sucrose solution per CS+ trial (P=0.9902) and **f** Average latency to lick from sucrose solution per CS+ trial (P=0.8076). Data were analyzed using multiple Student's two-tailed paired t-test. Data shown as mean  $\pm$  SEM; \*\*P<0.01, \*\*\*P<0.001. Source data are provided as a Source Data file. Created with Biorender.com.

## Supplementary Figure 2

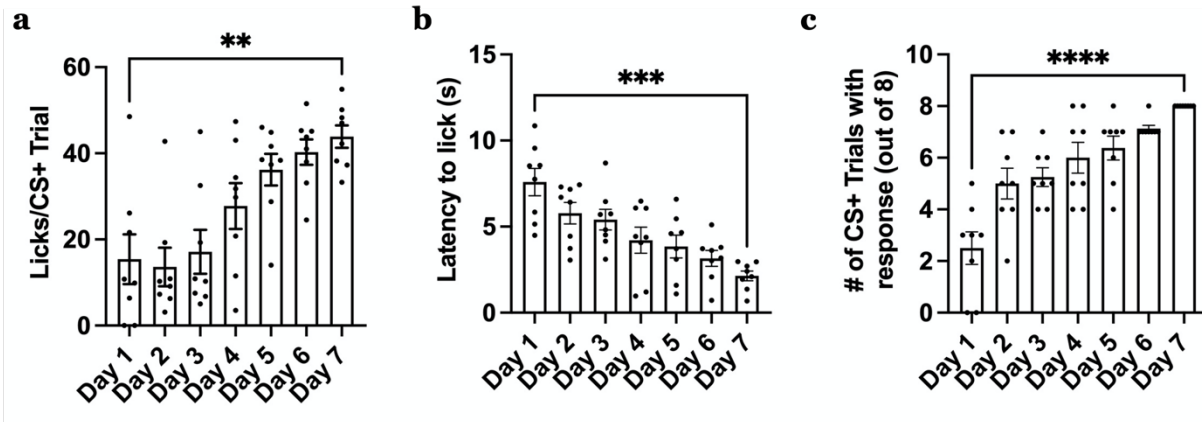

**Supplementary Figure 2. Training data for chemogenetic activation of MCH neurons during Pavlovian Discrimination Task in rats** (data were analyzed using a one-way ANOVA with repeated measures and multiple comparisons,  $n=8$  rats) with **a** Average number of licks to sucrose solution per CS+ trial, **b** Average latency to lick from sucrose solution per CS+ trial and **c** Average number of CS+ trials with response via licking sucrose solution. Data shown as mean  $\pm$  SEM; \*\* $P<0.01$ , \*\*\* $P<0.001$ , \*\*\*\* $P<0.0001$ . Source data are provided as a Source Data file.

### **Supplementary Figure 3**

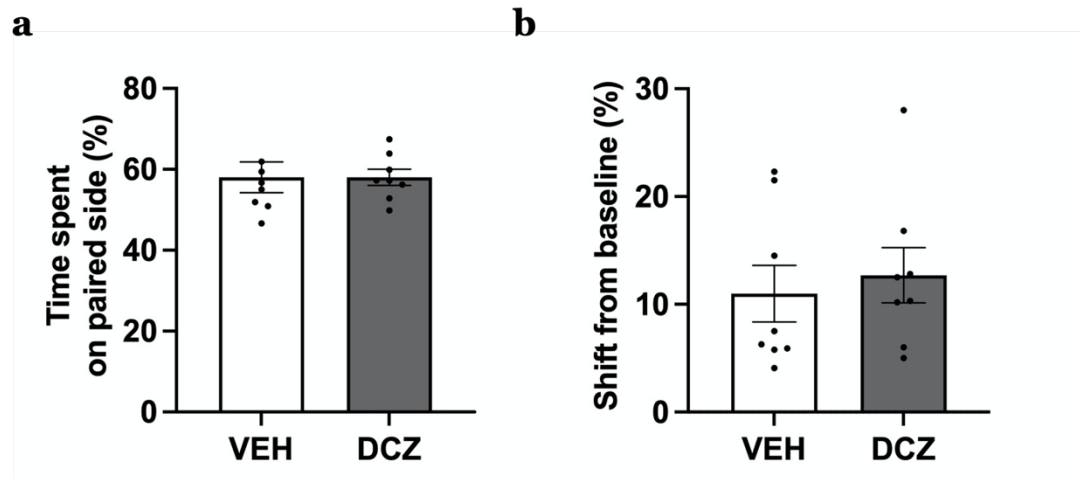

**Supplementary Figure 3. IP DCZ does not impact food-seeking memory behavior during CPP in rats (n=7).** Animals were injected using a counterbalanced, within subjects design. **a-b** Effects of IP DCZ during test phase of CPP (data analyzed using Students two-tailed paired t-test, n=7 rats) with **a** Time spent on paired side represented as a percentage ( $P=0.9929$ ) and **b** Shift from baseline (Difference in time spent on side between pre- and post-training,  $P=0.3684$ ). Data shown as mean  $\pm$  SEM. Source data are provided as a Source Data file.

## Supplementary Figure 4

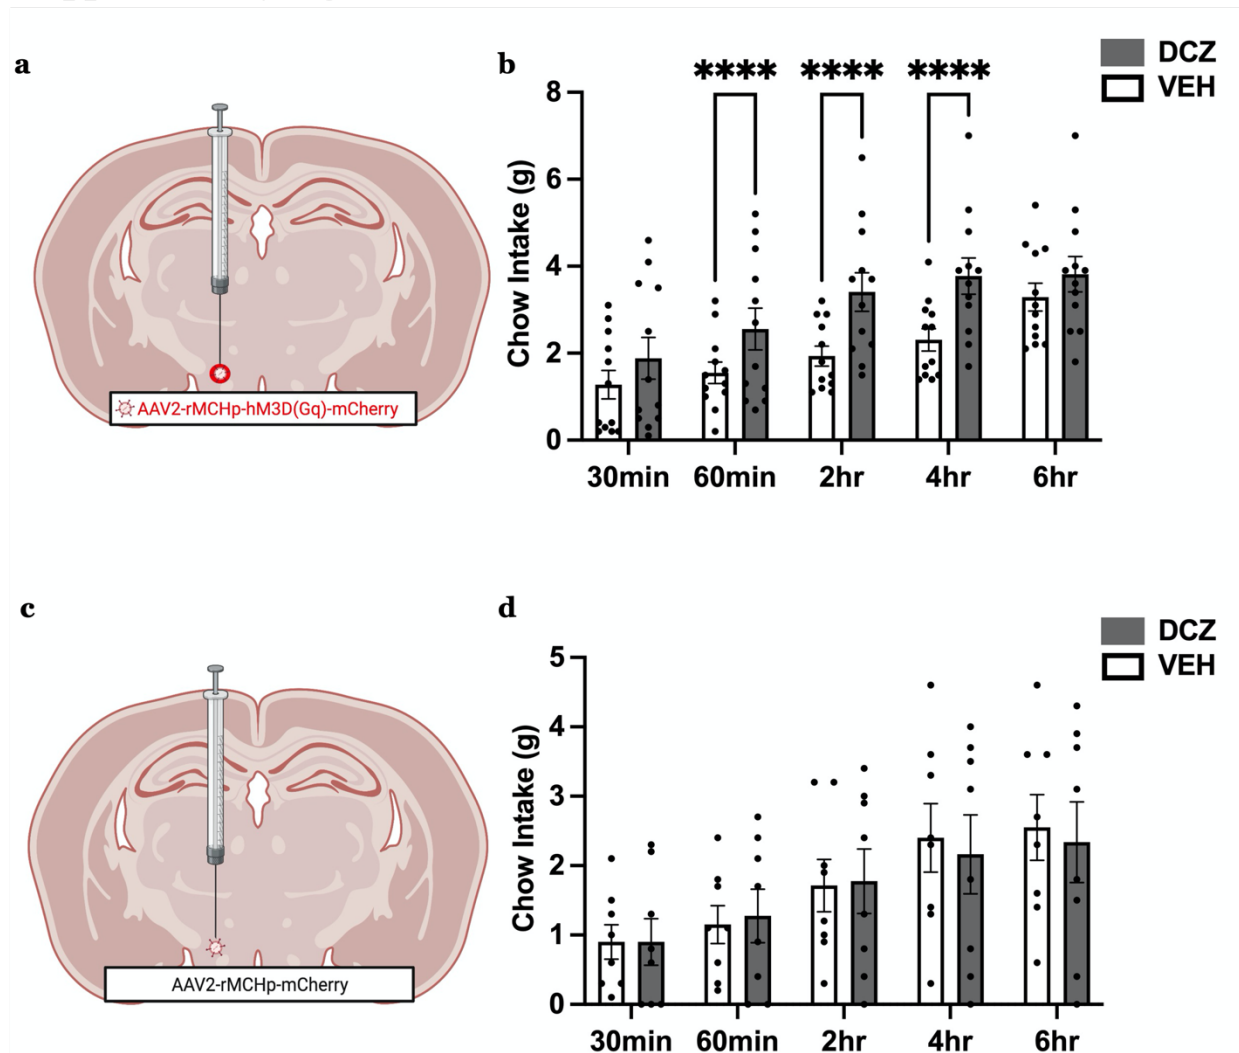

**Supplementary Figure 4. Chemogenetic activation of MCH neurons via IP DCZ increases food intake in rats (n=12).** Animals were injected using a counterbalanced, within-subject design. **a** Schematic cartoon depicting viral approach to chemogenetically activate MCH neurons. An adeno-associated-virus containing excitatory MCH DREADDs-mCherry transgene (AAV2-rMCHp-hM3D(Gq)-mCherry) is injected into the LHA and ZI. **b** Effect of chemogenetic activation of MCH neurons on home cage chow intake (2hr, \*\*P=0.0027, 4hr, \*\*P=0.0013, n=12 rats). **c** Schematic cartoon depicting viral approach to administer a cre-dependent adeno-associated-virus containing excitatory MCH DREADDs-mCherry transgene (AAV2-DIO-rMCHp-hM3D(Gq)-mCherry) into the LHA and ZI in rats (n=8). **d** Effect of IP DCZ on home cage chow intake (n=8 rats). Data were analyzed using multiple Student's two-tailed paired t-test and ANOVA repeated measures. Data shown as mean  $\pm$  SEM; \*\*\*\*P<0.0001. Source data are provided as a Source Data file. Created with Biorender.com.

## Supplementary Figure 5

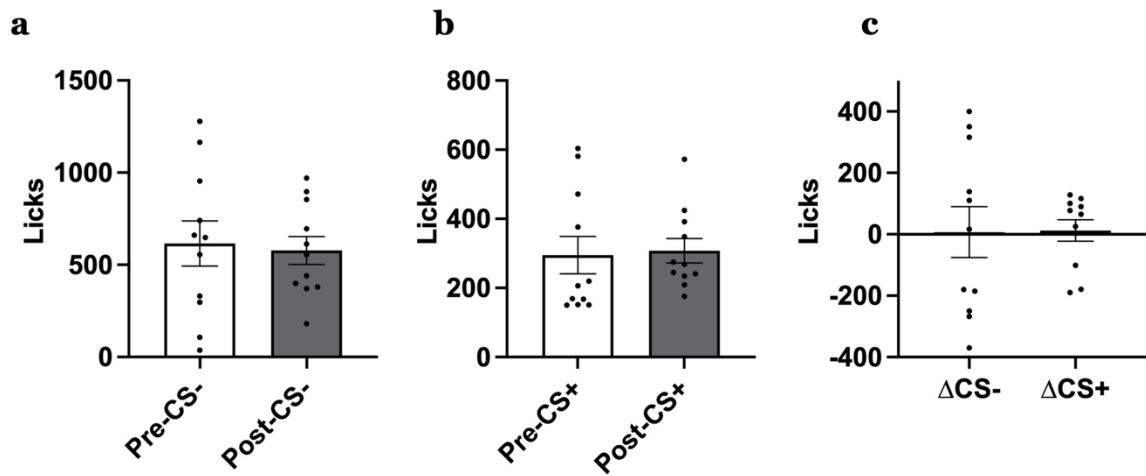

**Supplementary Figure 5: IP DCZ does not promote flavor preference conditioning in rats (n=11).** Throughout training, animals were counterbalanced and injected using a within-subjects design. **a** Number of licks during the pre- and post-two bottle preference tests for the vehicle-paired CS- ( $P=0.7952$  and **b** DCZ paired CS+ ( $P=0.7313$ ). **c** Difference in number of licks between pre and post two bottle preference tests for the CS- and CS+ ( $P=0.9555$ ). Data were analyzed using multiple Student's two-tailed paired t-test. Data shown as mean  $\pm$  SEM. Source data are provided as a Source Data file.

**Supplementary Figure 6**

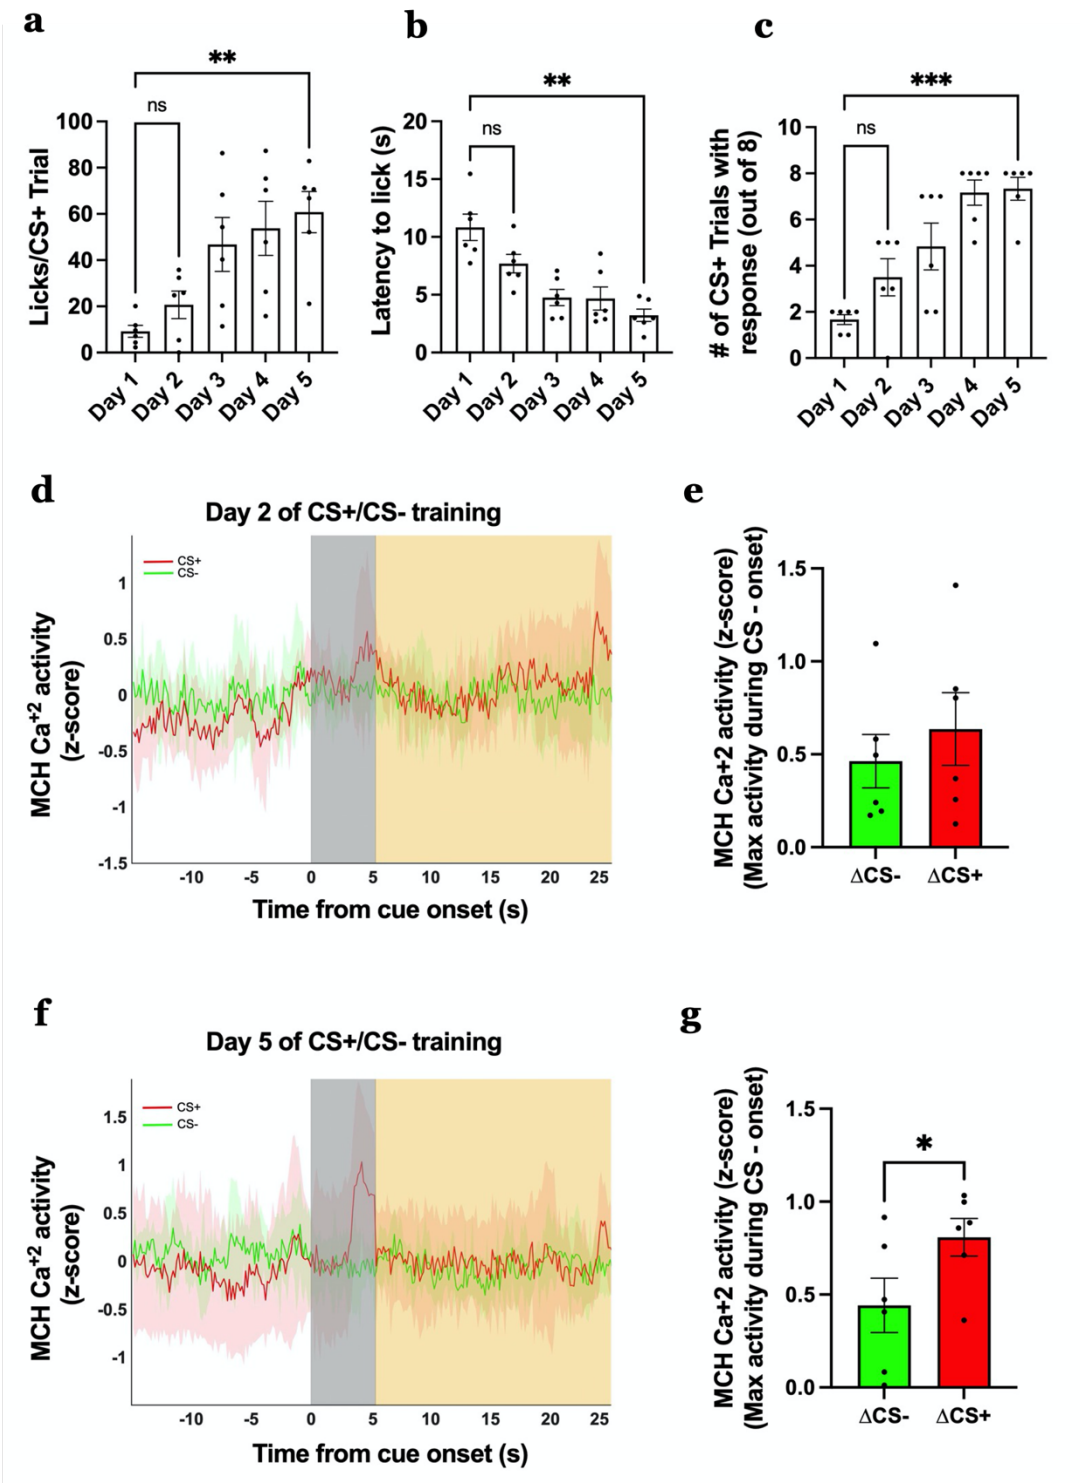

**Supplementary Figure 6: Physiological MCH neuron  $\text{Ca}^{2+}$  activity increases in response to discrete food-predictive cues by the 5th CS training session, thus corresponding with behavioral evidence of learning in rats (n=6).** **a-c** Training data for the first five CS sessions of the Pavlovian Discrimination Task (data were analyzed using a one-way ANOVA with repeated measures and multiple comparisons, n=6 rats): **a** Average number of licks for sucrose solution per CS+ trial, **b** Average latency to lick from sucrose solution per CS+ trial, and **c** Average number of CS+ trials with response via licking sucrose solution. **d-e** Fiber photometry recording of MCH neuron  $\text{Ca}^{2+}$  activity during the 2<sup>nd</sup> CS training session (data analyzed using Students two-tailed paired t-test, n=6 rats) **d** Trace of MCH neuron  $\text{Ca}^{2+}$  activity with MCH neuron  $\text{Ca}^{2+}$  activity (z-score) time locked to cue onset (CS+ in red and CS- in green; -15 to 25 s relative to the start of the 5s cue [gray box] **e** MCH neuron  $\text{Ca}^{2+}$  activity during cue period [gray box] (max activity during CS – activity during cue onset,  $P=0.5757$ ) **f-g** Fiber photometry recording of MCH neuron  $\text{Ca}^{2+}$  activity during the 5th CS training session (data analyzed using Students two-tailed paired t-test, n=6 rats) **f** Trace of MCH neuron  $\text{Ca}^{2+}$  activity with MCH neuron  $\text{Ca}^{2+}$  activity (z-score) time locked to cue onset (CS+ in red and CS- in green; -15 to 25 s relative to the start of the 5s cue [gray box] **g** MCH neuron  $\text{Ca}^{2+}$  activity during cue period [gray box] (max activity during CS – activity during cue onset,  $*P=0.0141$ ).  $**P<0.01$ ,  $***P<0.001$ . Source data are provided as a Source Data file.
